# Supplementary figures and images for: Predictive Algorithm for Hepatic Steatosis Detection Using Elastography Data in the Veterans Affairs Electronic Health Records
Source: PubMed Central journal article supplement — Dig Dis Sci. 2023 Oct 21;68(12):4474–84. doi: 10.1007/s10620-023-08043-8 (PMC10635943; doi:10.1007/s10620-023-08043-8), 2023-10-21

**ROC for CAP predicting gold standard  
using only MRI and Biopsy (no Ultrasound)**

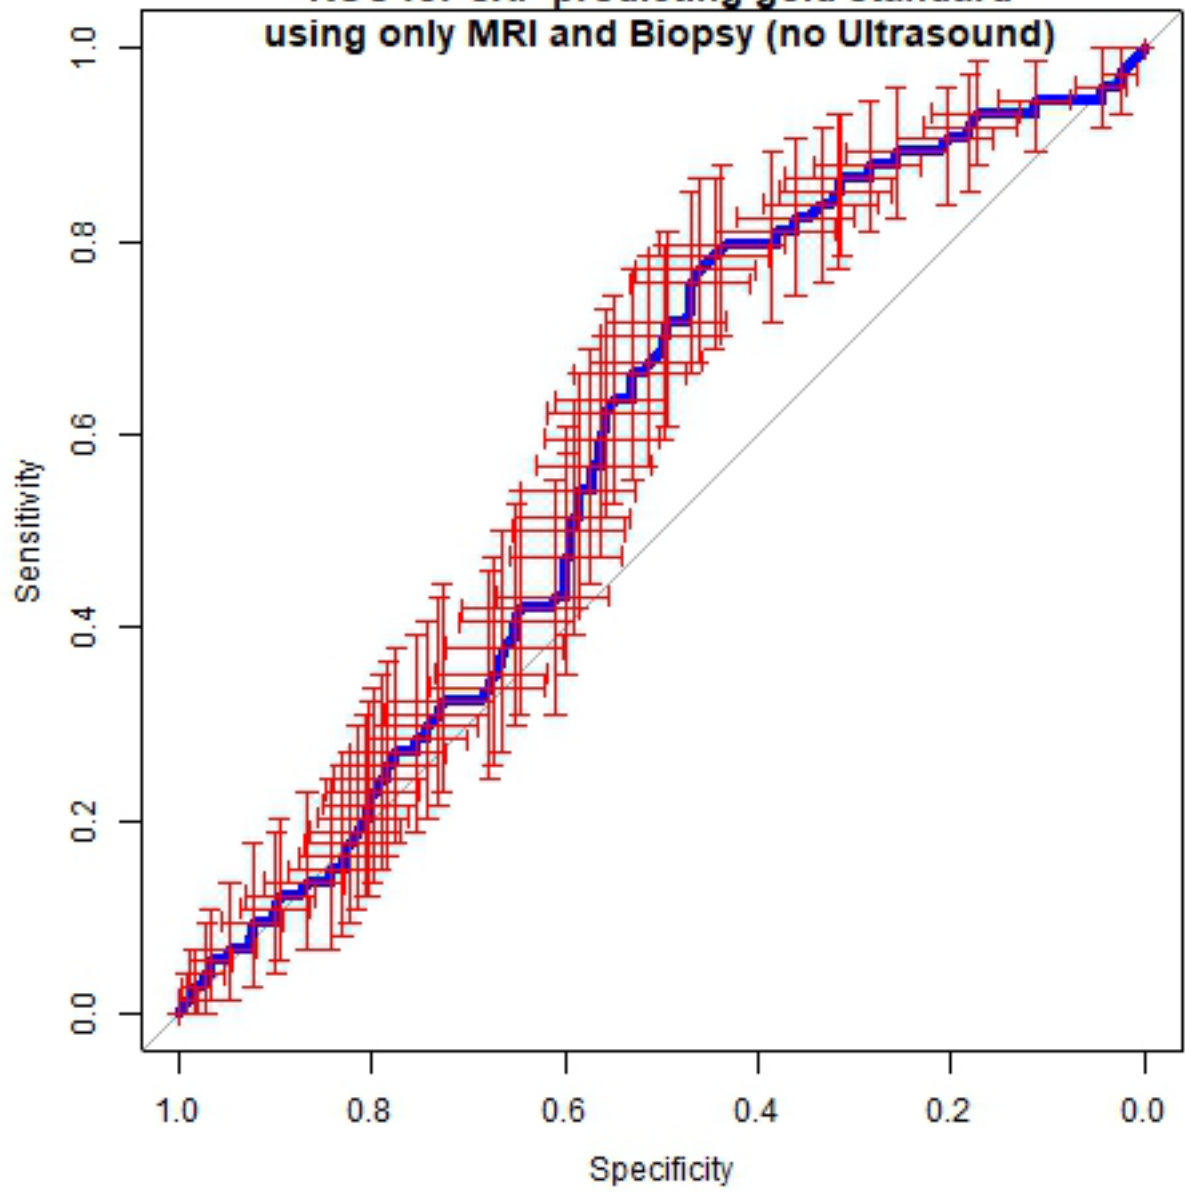

Supplement: 10620_2023_8043_MOESM10_ESM.pdf [file 10620_2023_8043_MOESM10_ESM.pdf]

Distribution of Controlled Attenuation Parameter  
Validation sample

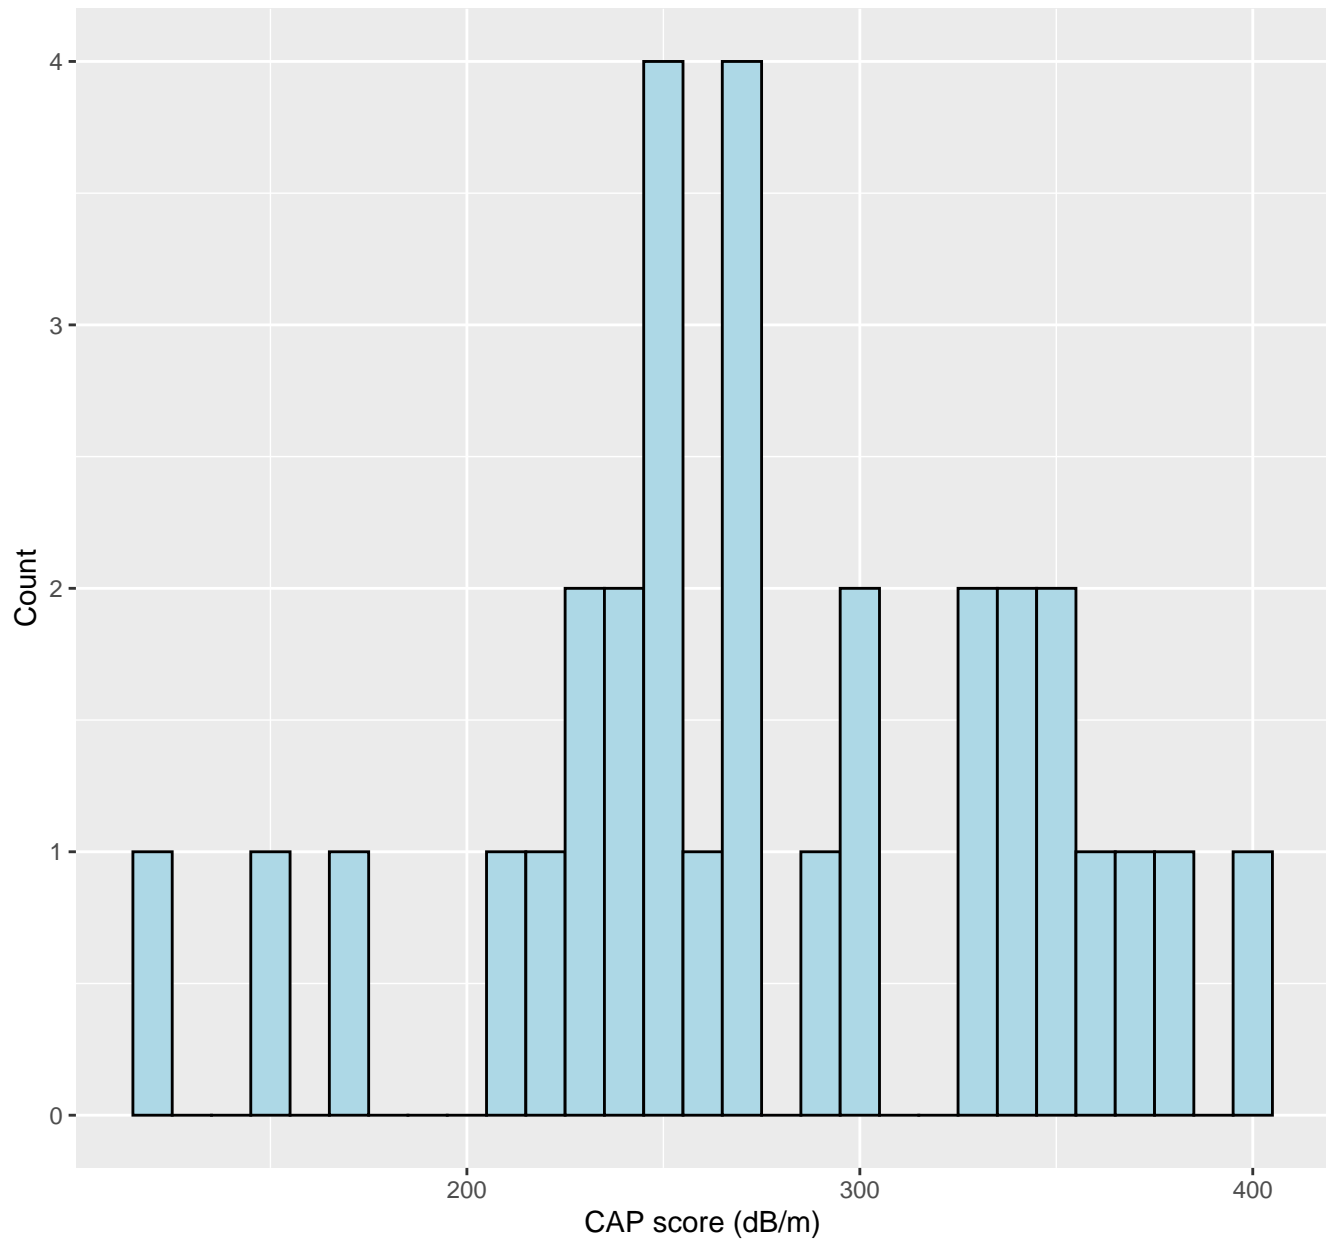

Supplement: 10620_2023_8043_MOESM1_ESM.pdf [file 10620_2023_8043_MOESM1_ESM.pdf]

## Statin prescription and LDL

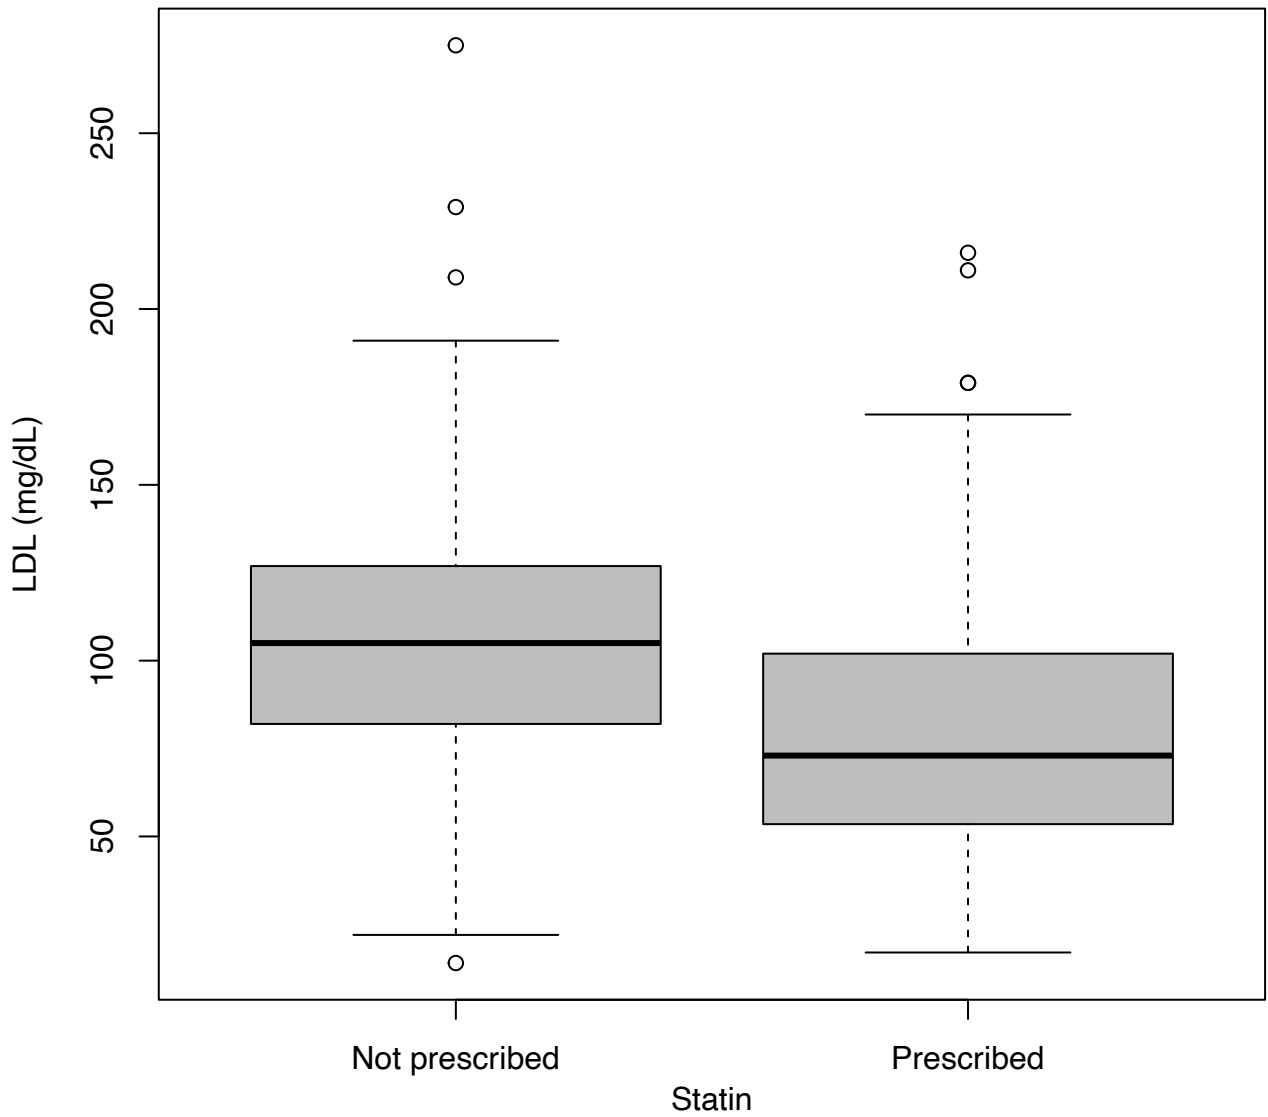

$t(393.17) = 7.25, p < .001$

Supplement: 10620_2023_8043_MOESM3_ESM.pdf [file 10620_2023_8043_MOESM3_ESM.pdf]

## Diabetes prescription and hemoglobin A1c

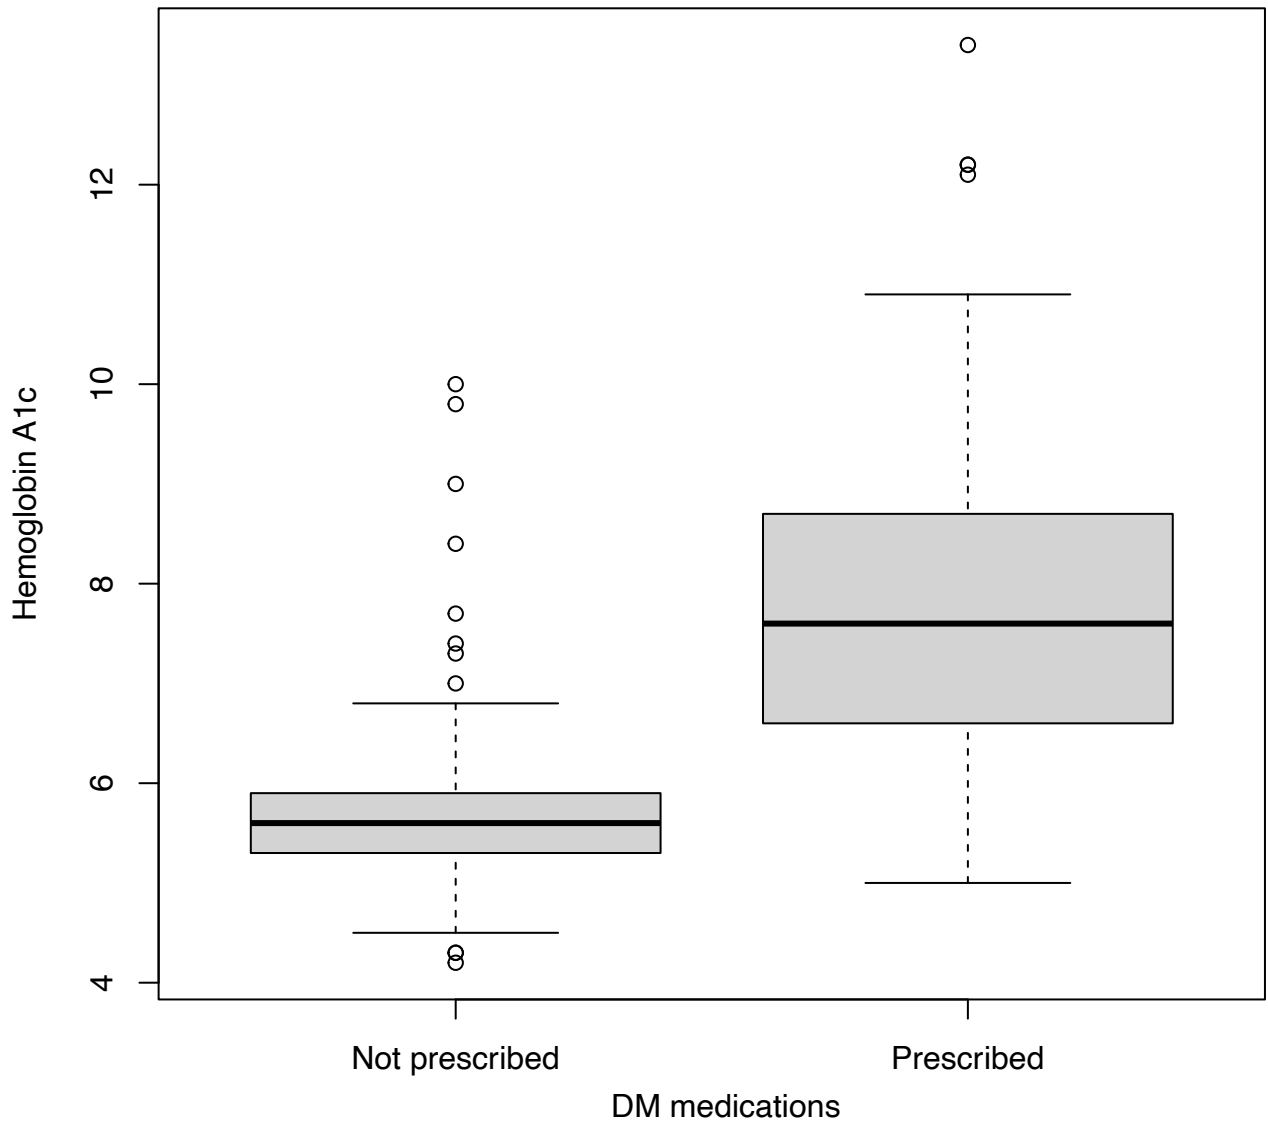

$t(140.86) = -14.43, p < .001$

Supplement: 10620_2023_8043_MOESM4_ESM.pdf [file 10620_2023_8043_MOESM4_ESM.pdf]

# RMSEA by number of predictors in model

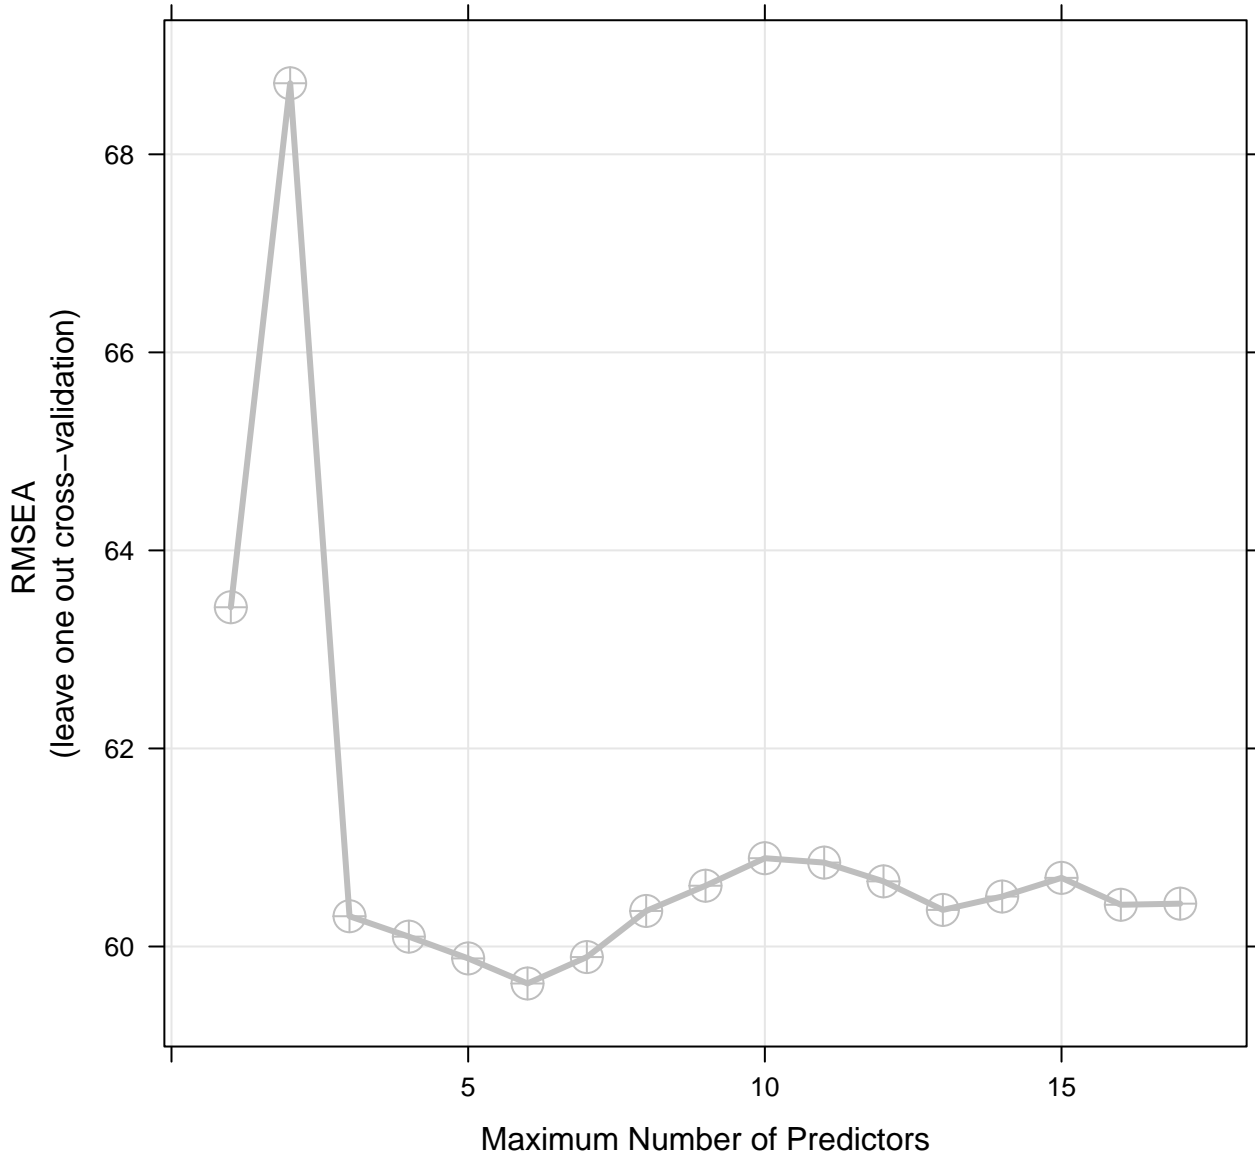

Supplement: 10620_2023_8043_MOESM5_ESM.pdf [file 10620_2023_8043_MOESM5_ESM.pdf]

A

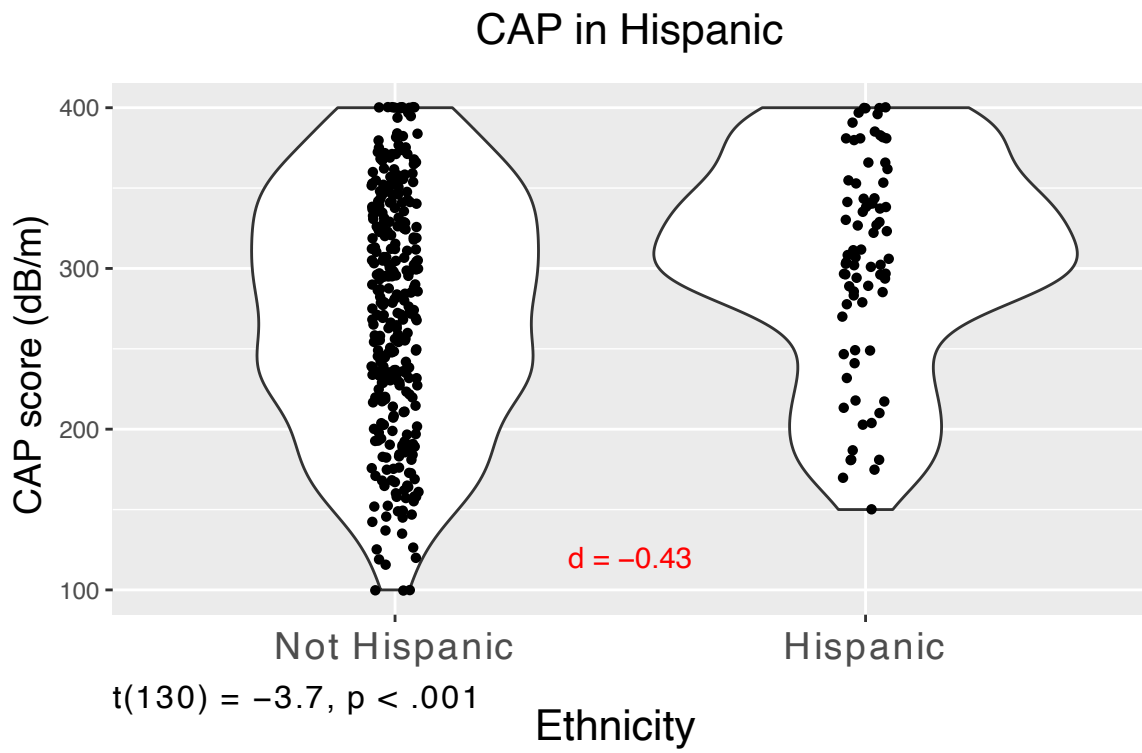

B

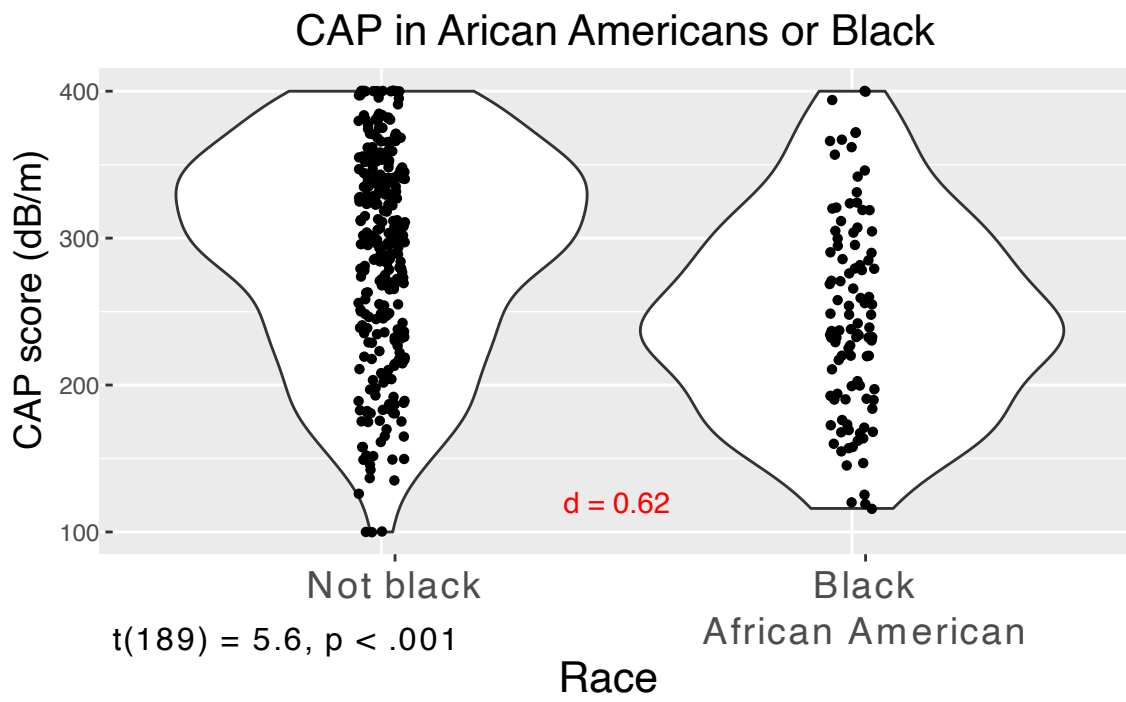

Supplement: 10620_2023_8043_MOESM6_ESM.pdf [file 10620_2023_8043_MOESM6_ESM.pdf]

Relationship of predicted and measured CAP  
in validation sample

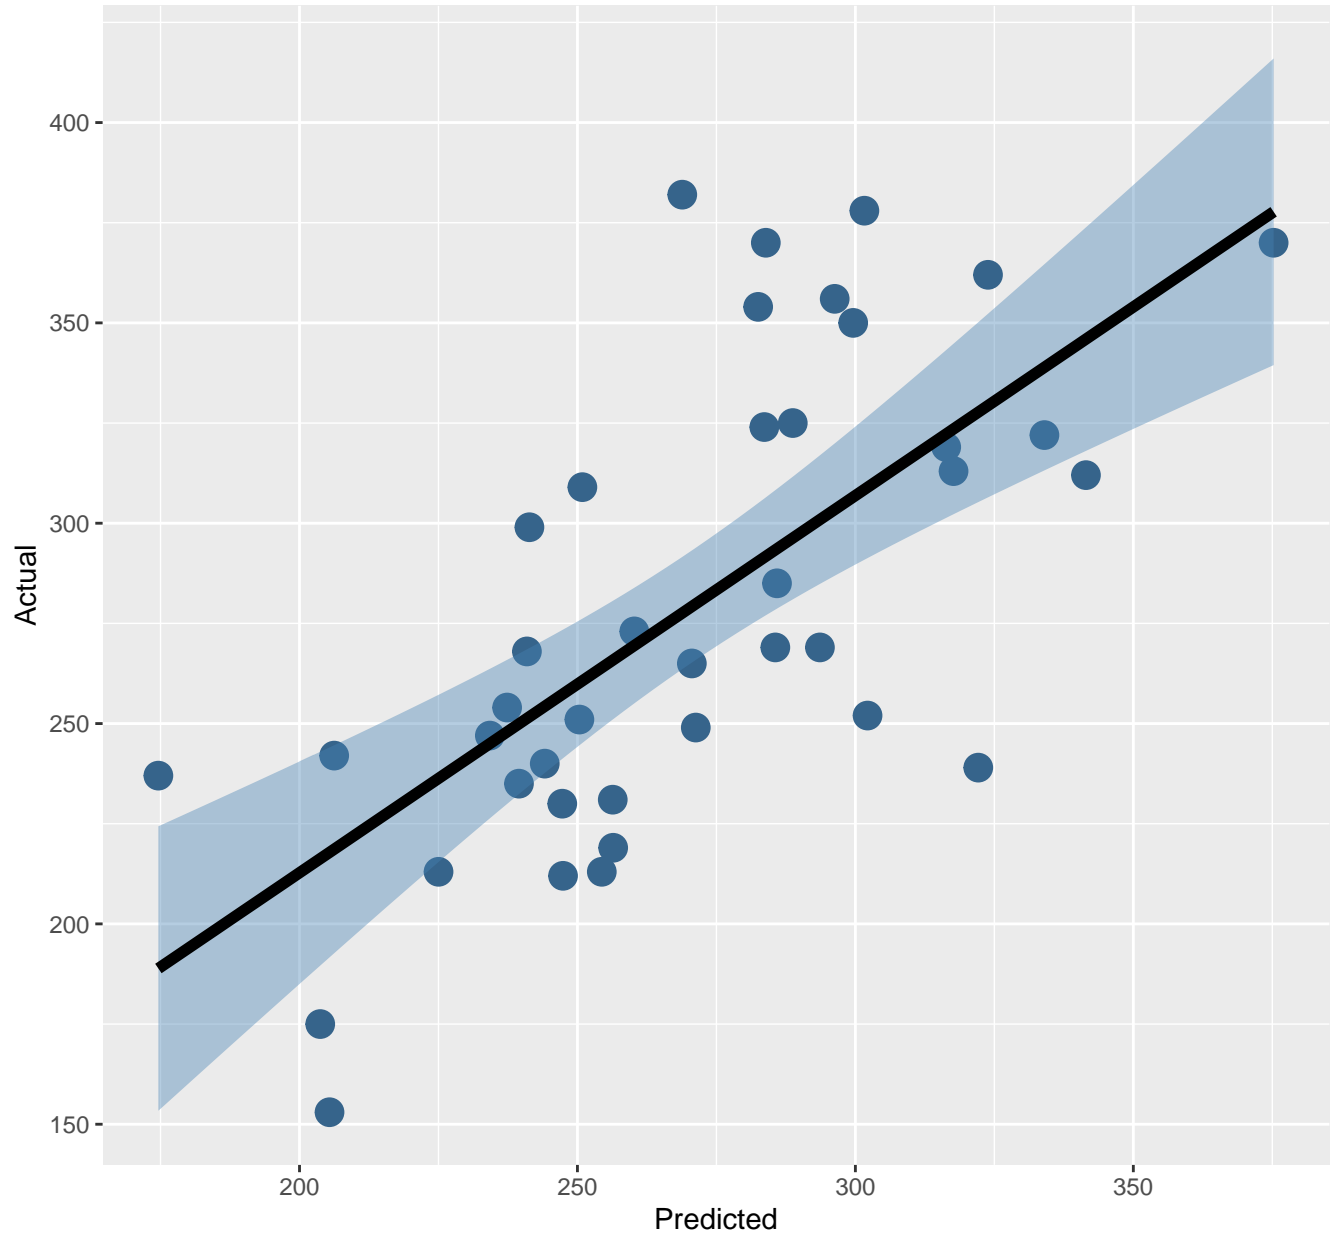

Supplement: 10620_2023_8043_MOESM7_ESM.pdf [file 10620_2023_8043_MOESM7_ESM.pdf]

A

### CAP and liver biopsy

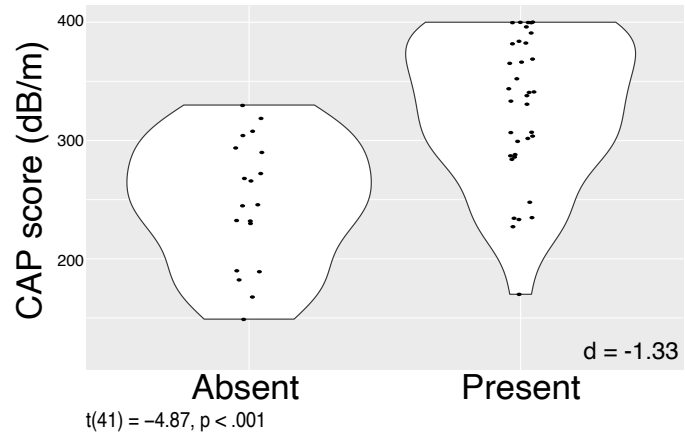

B

### CAP and MRI

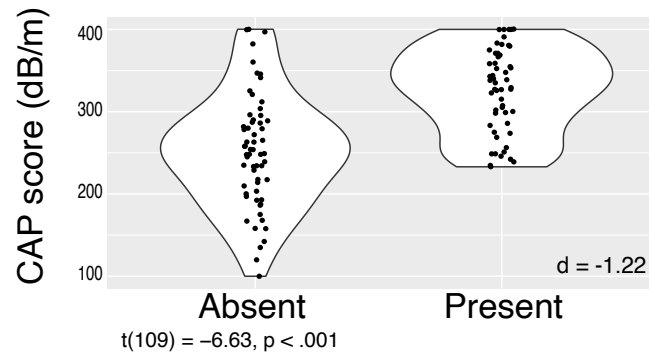

C

### CAP and ultrasound

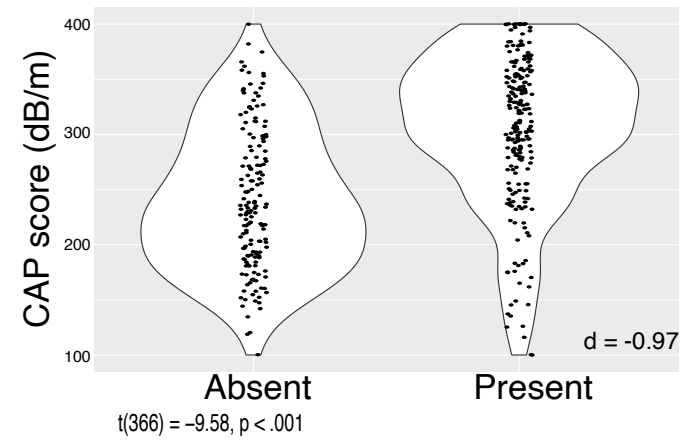

Supplement: 10620_2023_8043_MOESM8_ESM.pdf [file 10620_2023_8043_MOESM8_ESM.pdf]

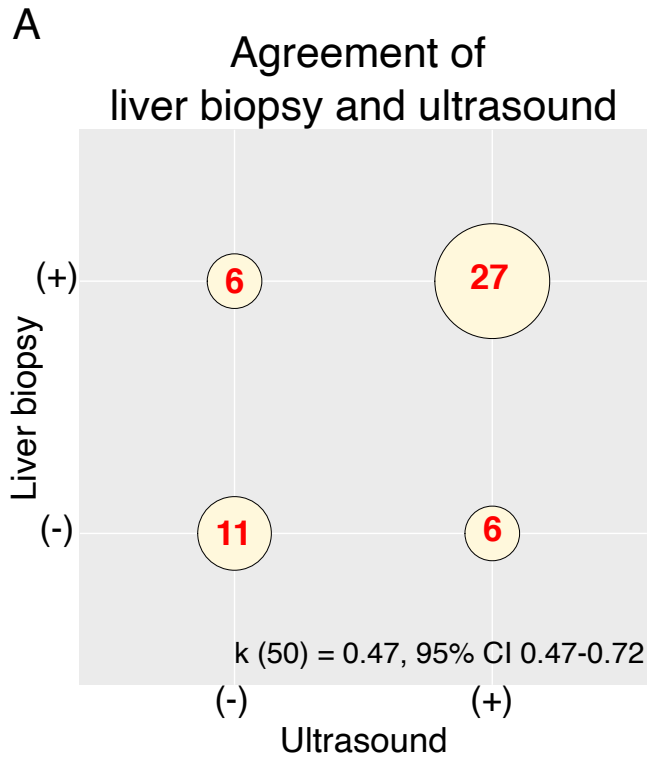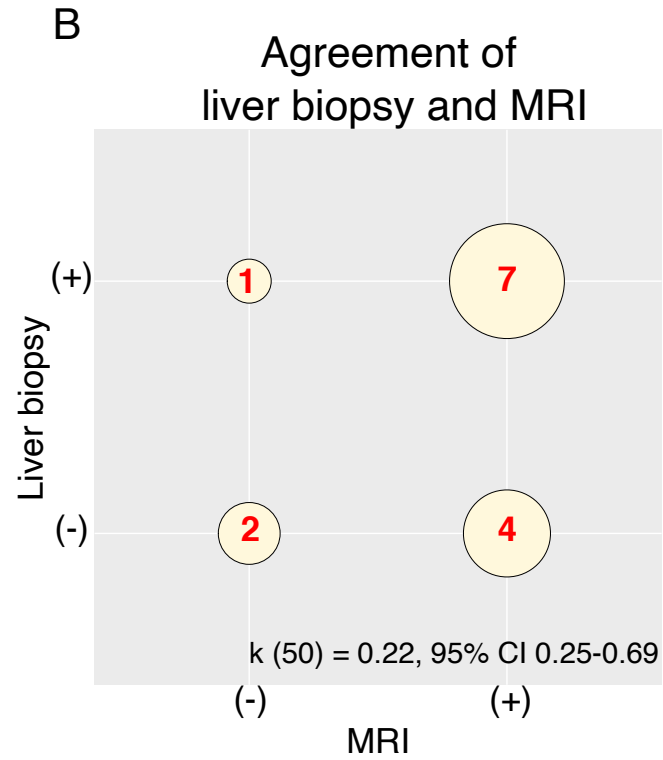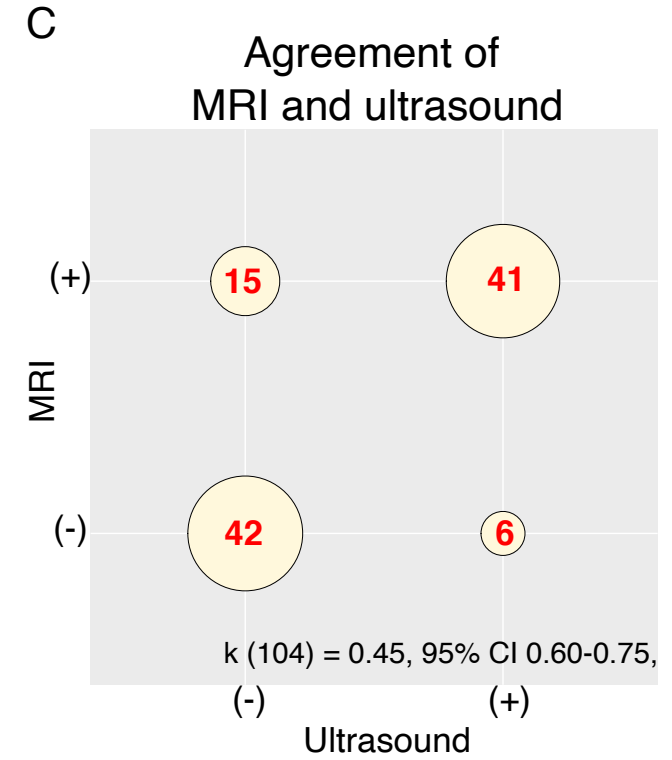

Supplement: 10620_2023_8043_MOESM9_ESM.pdf [file 10620_2023_8043_MOESM9_ESM.pdf]
